# 1 **Chromosome-scale and haplotype-resolved genome assembly** 2 **of a tetraploid potato cultivar**

3

4 Hequan Sun<sup>1,2,∇</sup>, Wen-Biao Jiao<sup>1,2,3,4,∇</sup>, Kristin Krause<sup>1,2</sup>, José A. Campoy<sup>2</sup>, Manish Goel<sup>1,2</sup>,  
5 Kat Folz-Donahue<sup>5</sup>, Christian Kukat<sup>5</sup>, Bruno Huettel<sup>6</sup>, and Korbinian Schneeberger<sup>1,2,\*</sup>

6

7 <sup>∇</sup> These authors contributed equally.

8

9 <sup>1</sup>Faculty of Biology, LMU Munich, Großhaderner Str. 2, 82152 Planegg-Martinsried, Germany <sup>2</sup>Department of  
10 Chromosome Biology, Max Planck Institute for Plant Breeding Research, Carl-von-Linné-Weg 10, 50829  
11 Cologne, Germany <sup>3</sup>Key Laboratory of Horticultural Plant Biology (Ministry of Education), Huazhong Agricultural  
12 University, 430070 Wuhan, China; <sup>4</sup>College of Informatics, Huazhong Agricultural University, 430070 Wuhan,  
13 China <sup>5</sup>FACS & Imaging Core Facility, Max Planck Institute for Biology of Ageing, 50931 Cologne, Germany <sup>6</sup>Max  
14 Planck-Genome-center Cologne, Carl-von-Linné-Weg 10, 50829 Cologne, Germany

15

16 \*Correspondence: Korbinian Schneeberger ([schneeberger@mpipz.mpg.de](mailto:schneeberger@mpipz.mpg.de))

17 Key words: tetraploid potato, haplotyping, *de novo* assembly, single-cell sequencing, gamete

18 **Potato is the third most important food crop in the world. Despite its social and**  
19 **economic importance, the autotetraploid genome of cultivated potato has not been**  
20 **assembled yet. The distinct reconstruction all of four haplotypes remained an**  
21 **unsolved challenge. Here, we report the 3.1 Gb haplotype-resolved, chromosome-**  
22 **scale assembly of the autotetraploid potato cultivar, *Otava*. We assembled the genome**  
23 **with high-quality long reads coupled with single-cell sequencing of 717 pollen**  
24 **genomes and chromosome conformation capture data at a haplotyping precision of**  
25 **99.6%. Unexpectedly, we found that almost 50% of the tetraploid genome were**  
26 **identical-by-descent with at least one of the other haplotypes. This high level of**  
27 **inbreeding contrasted with the extreme level of structural rearrangements**  
28 **encompassing nearly 20% of the genome. Overall, we annotated 148,577 gene models,**  
29 **where only 54% of the genes were present in all four haplotypes with an average of 3.2**  
30 **copies per gene. Our work showcases how accurate assemblies of complex and**  
31 **partially inbred autotetraploid genomes can be generated. The newly established**  
32 **resource gives novel insights in the breeding history of autotetraploid potato and has**  
33 **the potential to change the future of genomics-assisted potato breeding.**

34 Potato (*Solanum tuberosum* L.) is by far the most important tuber crop and is among  
35 the five most produced crops in the world. Globally more than 350 billion kilograms of potato  
36 are produced per year with an increasing trend particularly in developing countries in Asia<sup>1</sup>.  
37 Despite the social and economic importance, the breeding success of potato remained low  
38 over the past decades due to its highly heterozygous and tetraploid genome, which  
39 challenges usual breeding commonly applied to inbred, diploid crops<sup>2,3</sup>.

40 A fundamental tool for modern breeding is the availability of reference sequences.  
41 The reference sequence for potato was generated from a double haploid plant, *DM1-3 516*  
42 *R44* (*DM*), and was initially published in 2011<sup>4</sup> and continuously improved over the past  
43 years including a recent update based on long read sequencing<sup>5</sup>. Another major  
44 advancement in potato genomics was the recent assembly of a heterozygous diploid potato,  
45 *RH89-039-16* (*RH*)<sup>6</sup>. This haplotype-resolved genome was generated from a variety of

46 different sequencing technologies and phase information from a genetic map derived from  
47 selfed progeny<sup>6</sup>.

48 However, as of now, there is no haplotype-resolved assembly of a tetraploid potato  
49 cultivar available. The latest methods for haplotype phasing include haplotype-based  
50 separation of sequencing reads based on the differences between the parental genomes<sup>7</sup> or  
51 based on haplotype information derived from gamete<sup>8-11</sup> or offspring genomes<sup>6,12</sup>. Similarly,  
52 chromosome conformation capture sequencing (e.g., Hi-C) could help to resolve haplotypes  
53 during or before the assembly<sup>13-17</sup> and has been applied to polyploids already<sup>14,15,16</sup>. But even  
54 though straightforward in its application, chromosome conformation capture sequencing can  
55 lead to haplotype switch errors, and requires additional efforts such genetic maps for  
56 correction<sup>6,8,17</sup>.

## 57 **Genome assembly of a tetraploid potato**

58 We generated an assembly of the autotetraploid genome of *S. tuberosum*, cultivar  
59 *Otava*, using high-quality long PacBio HiFi reads (30x per haplotype) using *hifiasm*<sup>18</sup> (Fig. 1a;  
60 Supplementary Table 1; Supplementary Figure 1-4; Methods). The initial assembly consisted  
61 of 6,366 contigs with an N50 of 2.1 Mb. While the total assembly size of 2.2 Gb was much  
62 larger than the estimated haploid genome size of ~840 Mb, it accounted only for ~65% of the  
63 tetraploid genome size indicating that one third of the genome collapsed during the assembly  
64 (Supplementary Figure 2). A sequencing depth histogram across the contigs featured four  
65 distinct peaks, which originated from regions with either one, two, three, or four (collapsed)  
66 haplotype(s) (Fig. 1b). While most of the contigs represented only one haplotype (referred to  
67 as *haplotigs*) and accounted for 1.5 Gb (68%) of the assembly, contigs representing two,  
68 three or even four collapsed haplotypes (referred to as *diplotigs*, *triplotigs* or *tetraplotigs*) still  
69 made up 470 Mb (21%), 173 Mb (8%) or 43 Mb (2%). Regions with even higher coverages  
70 were virtually absent (9.4 Mb, 0.4%).

71 As there is no straight forward solution to untangle collapsed contigs after the  
72 assembly, we restarted the genome assembly, this time with four separated read sets each  
73 derived from one of the four haplotypes. In diploids, such a read separation prior to the

74 assembly can be performed by sorting the reads according to their similarity to the parental  
75 genomes (trio binning)<sup>7</sup>. But as autotetraploid individuals inherit two haplotypes through both  
76 the maternal and paternal lineages, this cannot be applied for autotetraploid genomes.  
77 Alternatively, the reads can also be separated using the haplotypes found in gamete  
78 genomes (gamete binning)<sup>8</sup>. While this is straightforward with haploid gametes from diploid  
79 individuals, tetraploid potato develops diploid gametes, which again does not separate  
80 individual haplotypes. However, as the pairing of the two haplotypes in a diploid gamete is  
81 random in potato, we speculated that it might be possible to gain information on individual  
82 haplotypes (and thus to separate the reads into four distinct sets) if we sequence a sufficient  
83 number of diploid gametes.

84 To test if gamete binning can be applied for the genome assembly of *Otava*, we  
85 sequenced the genomes from 717 pollen nuclei with Illumina short reads with an average  
86 sequence coverage of 0.18x (Supplementary Figure 5; Methods) and aligned each of the 717  
87 read sets against the initial assembly. As defining a high-density SNP list can be difficult in  
88 an autotetraploid genome, we defined “coverage markers” (using average alignment depth in  
89 50 kb windows) to assess if a genomic region was present in a pollen genome or not  
90 (Methods).

91 A coverage marker will be covered by reads if one of the two haplotypes of a pollen  
92 carries the region of the coverage marker. With this, we could assess the presence/absence  
93 pattern (PAP) of a coverage marker across all the 717 pollen genomes (Supplementary  
94 Figure 6). Closely linked markers featured highly similar PAPs, as most pollen genomes  
95 carried the same pair of haplotypes at two neighboring loci. We used similarities between  
96 PAPs to cluster the contigs into 48 groups representing the four haplotypes of all 12  
97 chromosomes (Supplementary Figure 7-8; Methods). Haplotigs were assigned to single  
98 clusters. Diplotigs, triplotigs and tetraplotigs represented multiple haplotypes and were  
99 assigned to two, three or four of the clusters (Methods).

100 Once the contigs were assigned to haplotypes, also the PacBio HiFi reads could be  
101 assigned to these haplotypes based on their alignments against the contigs. Reads aligned

102 to diplotigs, triplotigs or tetraplotigs were randomly assigned to one of the respective  
103 haplotypes. With this, more than 99.9% of the non-organellar PacBio HiFi reads could be  
104 assigned to one of the 48 read sets (Supplementary Figure 9; Methods). Assembling the  
105 read sets using *hifiasm* resulted in 48 haplotype-resolved assemblies with an average N50 of  
106 7.1 Mb and a total size of 3.1 Gb (92% of the tetraploid genome). Finally, we used Hi-C short  
107 read data (70x per haplotype) to scaffold the contigs of each assembly to a chromosome-  
108 scale, haplotype-resolved assembly (Supplementary Figure 10; Methods).

109 The sizes of the four haplotypes of each chromosome were highly consistent to each  
110 other as well as to those of the *DM* and *RH* assemblies<sup>4,5,6</sup> except for the consistently shorter  
111 assemblies of LG10 (Fig. 1c). Comparison with the *DM* assembly showed high levels of  
112 synteny suggesting that the chromosomes have been assembled correctly (Supplementary  
113 Figure 11-12). To evaluate the haplotyping accuracy of the tetraploid assembly in more  
114 depth, we sequenced the parental cultivars of *Otava*, called *Stieglitz* and *Hera*, with Illumina  
115 short reads with 40x genome coverage. Comparing the parental genome specific *k*-mers, we  
116 found that each of the 48 assemblies included almost exclusively *k*-mers from one or the  
117 other parent implying a haplotyping accuracy of 99.6% (Fig. 1d; Methods).

118 Integrating *ab initio* predictions, protein and RNA-seq read<sup>4,5,6</sup> alignments, we  
119 annotated 148,577 gene models across all haplotypes with an overall *BUSCO*<sup>19</sup>  
120 completeness score of 97.3%, which is highly comparable to the annotations of the *RH* and  
121 *DM* assemblies<sup>5,6</sup> (Supplementary Table 2-3; Methods). Repetitive sequences made up 66%  
122 of the assembly with LTR retrotransposons as the most abundant class and rDNA clusters of  
123 up to 600 kb in size, which were assembled without any gaps (Supplementary Table 4-5;  
124 Methods). The distribution of genes and repeats along the chromosome followed the typical  
125 distribution of plant genomes with high gene and low repeat densities at the distal parts of  
126 the chromosome, while in the peri-centromeric regions the gene densities were low and the  
127 repeat densities were high (Fig. 2).

## 128 **The genomic footprints of inbreeding**

129 A histogram of sequence differences within 10kb windows between the haplotypes  
130 revealed two separated peaks implying the presence of highly similar as well as highly  
131 different regions (Fig. 3a). The divergent regions averaged 1 SNP per 17 bp, while nearly  
132 50% of the regions were without differences (Fig. 3a). This extreme similarity between some  
133 of the regions suggested that they were recently inherited from a common ancestor. In fact,  
134 the pedigree of many of the cultivated potatoes, including *Otava*, contain cultivars that occur  
135 more than once in their ancestry<sup>20,21</sup> (Supplementary Figure 1). Common ancestors in  
136 different lineages of the pedigree leads to inbreeding and results in regions which are  
137 identical-by-descent (IBD) between their haplotypes (Fig. 3b-c; Supplementary Figure 13-24;  
138 Methods).

139 Overall, almost 50% of the tetraploid genome of *Otava* were included in IBD blocks  
140 and were shared by either two, three or in rare cases even by four haplotypes (Fig. 3b-d).  
141 Individual IBD blocks varied in size and reached up to 41.6 Mb, while IBD blocks in the peri-  
142 centromeres were significantly larger as compared to the IBD blocks in the distal parts of the  
143 chromosomes (Supplementary Figure 13-25). Even though it is possible that long IBD blocks  
144 were recently introduced and were not broken up by meiotic recombination yet, it is more  
145 likely that these extremely long IBD blocks exist due to local suppression of meiotic  
146 recombination in the peri-centromeres (Fig. 3c). Using the accumulated mutation rates in the  
147 IBD blocks as an estimate of their age showed that long IBD blocks weren't younger as  
148 compared to short IBD blocks (Supplementary Figure 25b).

## 149 **Extreme sequence differences and their influence on genes**

150 The highly similar IBD blocks were contrasted by high levels of structural  
151 rearrangements in the non-shared regions of the genome (Fig. 3; Supplementary Figure 13-  
152 24; Methods). Inversions, duplications, and translocations made up 3.8% to 42.9% of each of  
153 the haplotypes (or 19.3% of the genome) depending on the abundance of IBD regions in the  
154 respective haplotypes (Fig. 3d). Excluding IBD regions, structural rearrangements made up  
155 15.0% to 65.8% of each chromosome. In addition to these high levels of structural

156 differences, each haplotype included another 11.0% to 42.5% of unique sequence that could  
157 not be aligned to the other haplotypes (Fig. 3d). This amount of structural variation and  
158 haplotype-specific sequence was much higher than what has been reported for any other  
159 crop species, supporting earlier suggestions that wild introgressions were part of the  
160 domestication history of potato<sup>22</sup>.

161 Overall, we found 661 structural variations longer than 100 kb which all were  
162 supported by the contiguity of the assembled contigs or Hi-C contact signals, including 220  
163 duplications, 207 translocations and 234 inversions (Supplementary Table 6; Supplementary  
164 Fig. 10,13-24,26). While comparable in number, inversions were much larger than the other  
165 types of rearrangements and reached sizes of up to 12.4 Mb (Fig. 3f). Although these large  
166 inversions were mostly located in the peri-centromeric regions where genes occur at low  
167 density, they still harbored nearly 5% of all genes (7,958 out of 148,577). Meiotic crossover  
168 events within the pollen genomes were virtually absent in the inversions, indicating that these  
169 regions are likely to introduce large segregating haplotypes among cultivated potato (Fig.  
170 3c).

171 Pairwise allelic divergence of the genes ranged from 0 to 140 differences per kb and  
172 included identical as well as divergent alleles. The average pairwise difference of the  
173 divergent alleles was 18 differences per kb (Fig. 4a). Moreover, due to the high sequence  
174 differences, only 53.6% of the genes were present in all four haplotypes. The remaining 46.4%  
175 of the genes were present in three (20.0%), two (15.9%) or even only one (10.5%) of the  
176 haplotypes (Fig. 4b) with an average of 3.2 copies per gene. In addition, the coding  
177 sequences of some of these copies were identical to each other. For example, only 3,066  
178 (15.4%) of the genes with four copies also featured four distinct alleles. In consequence,  
179 even though each gene featured 3.2 copies, there were only 1.9 distinct alleles per gene (Fig.  
180 4b).

181 While it was expected to find identical alleles within shared haplotypes, only ~45% of  
182 the identical alleles were actually within IDB blocks. To test if the high number of identical  
183 alleles between the otherwise different haplotypes was indicative of selection, we tested

184 whether the genes with identical alleles were enriched for specific functions. This revealed a  
185 significant enrichment for genes with GO terms involving photosynthesis, chlorophyll binding  
186 and translation (Fig. 4c) suggesting a selection-induced loss of allelic diversity through the  
187 optimization of plant performance.

188 The non-functional alleles of the genes were randomly distributed throughout the  
189 genome implying that a ploidy reduction of the tetraploid genome would lead to a significant  
190 gene loss. In fact, the doubled-monoploid *DM*<sup>1,5</sup> or diploid *RH*<sup>6</sup>, which both were derived from  
191 tetraploid cultivars, carried 5,901 (15.8%) or 3,245 (8.7%) less genes as compared to the  
192 tetraploid genome. The gene family with highest percentage of genes with presence/absence  
193 variation (45.4%; 316 out of 696 genes) were the NLR resistance genes (Supplementary  
194 Table 7), which are known for their high intraspecies variability<sup>23,24</sup>.

## 195 **Conclusions**

196 Here we reported the first haplotype-resolved assembly of an autotetraploid potato.  
197 Leveraging high-quality, long reads and single-cell genotyping of diploid gametes, we were  
198 able to reconstruct the sequences of all four haplotypes. This revealed the high levels of  
199 structural variation between the haplotypes, which were much higher as compared to the  
200 diversity commonly found within species. This supported earlier suggestions that the diverse  
201 haplotypes might have been introgressed from wild species during domestication<sup>22</sup>.

202 The high level of sequence differences was contrasted by widespread IBD blocks,  
203 which were most likely introduced by the common usage of related genotypes during  
204 cultivation, even though we cannot exclude that some of these blocks might have been  
205 formed via double reduction during meiosis<sup>25</sup>. The similarity of the IBD blocks was the reason  
206 for the abundant collapsed regions in the initial assembly. As these regions were almost  
207 identical, it was not possible to assemble them from the sequence data alone. IBD blocks are  
208 a widespread phenomenon in many crops or livestock in general, though the challenges  
209 associated with the high similarity between haplotypes can be solved by using the power of  
210 genetics and analyzing individual gamete genomes.



211           The abundance of IBD blocks also implied that the maximal allelic diversity of the  
212 tetraploid genome was not reached, even though the high yield and yield stability of potato is  
213 supposed to be promoted by the effects of heterosis, which itself is based on non-additive  
214 interactions of diverse alleles<sup>26</sup>. Whether the high abundance of shared alleles suggests that  
215 the effects of heterosis could still be optimized by increasing the number of polymorphic  
216 alleles or if this indicates that the limits of heterosis were already reached remains to be  
217 seen.

218           Over the past years, considerable success has been made in re-domesticating potato  
219 from a clonally-propagated, tetraploid crop into a seed-propagated, diploid crop to increase  
220 reproduction rate, decrease costs in storage and transportation, and improve disease  
221 control<sup>2,27,28,29</sup>. However, the random distribution of loss-of-function alleles in tetraploid potato  
222 can lead to the accelerated manifestation of inbreeding depression in the diploid genomes,  
223 when they are derived from tetraploids<sup>6,30</sup>. Haplotype-resolved assemblies of autotetraploids  
224 like the one presented here have the potential to support the design of optimal haplotypes by  
225 avoiding the combination of known incompatibility alleles<sup>31</sup>.

226           Of course, this new possibility to assemble autotetraploid genomes does not eliminate  
227 all breeding-related problems that result from the tetraploid nature of potato. However, being  
228 able to reconstruct the four haplotypes of cultivated potato is a breakthrough for modern  
229 genomics-assisted breeding strategies, and ultimately has the power to increase the  
230 breeding success of potato in the future.

231

## 232 **Methods**

233 Plant material was grown at Max Planck Institute for Plant Breeding Research  
234 (Cologne, Germany). The genome of *Otava* was sequenced with PacBio HiFi Sequel II  
235 platform with four SMRTcells. DNA extracted from individual pollen nuclei was prepared with  
236 10x Genomics CNV kits and subsequently sequenced with Illumina sequencing. Barcodes  
237 were corrected using *cellranger* (10x Genomics). Short/long reads were aligned using  
238 *bowtie2*<sup>32</sup>/*minimap2*<sup>33</sup>. BAM, VCF file processing and sequencing depth analysis were  
239 performed using *samtools*<sup>34</sup> and *bedtools*<sup>35</sup>. PacBio sequence reads were assembled using  
240 *hifiasm*<sup>18</sup>, and genome annotation was performed following a previous pipeline<sup>8</sup>. Structural  
241 variations were identified using *SyRI*<sup>66</sup> based on *minimap2* genome alignments. More details  
242 and other related methods are provided in the Supplementary Information.

## 243 **Acknowledgements**

244 The authors would like to thank Christiane Gebhardt (MPI-PZ, Cologne, Germany)  
245 and Benjamin Stich (HHU, Düsseldorf, Germany) for helpful discussions, Birgit Walkemeier  
246 and Christine Sanger (both MPI-PZ, Cologne, Germany) for help with plant cultivation,  
247 Christine Brandt and Klaus J. Dehmer (both IPK, Gro Lusewitz, Germany) for providing  
248 material, Padraig J. Flood (WUR, Wageningen, The Netherlands) for comments on the  
249 manuscript as well as Saurabh Pophaly (MPI-PZ, Cologne, Germany) for help in data  
250 management. This work was funded by the “Humboldt Research Fellowship for Experienced  
251 Researchers” (Alexander von Humboldt Foundation) (J.A.C.), the Marie Skłodowska-Curie  
252 Individual Fellowship PrunMut (789673) (J.A.C.), the Deutsche Forschungsgemeinschaft  
253 (DFG, German Research Foundation) under Germany’s Excellence Strategy – EXC 2048/1–  
254 390686111, and the European Research Council (ERC) Grant “INTERACT” (802629) (K.S.).

## 255 **Author contributions**

256 H.S. and K.S. developed the project. K.K., J.A.C., K.F-D., C.K. and B.H. generated  
257 data. H.S., W-B.J., and M.G. performed all data analysis. H.S. and K.S. wrote the manuscript  
258 with input from all authors. All authors read and approved the final manuscript.

259 **Competing interests**

260 The authors declare no competing interests.

261 **Data availability**

262 High-throughput sequencing data as well as the genome assembly and gene  
263 annotation of *Otava* will be made available through NCBI upon publication of this work under  
264 Bioproject PRJNA726019.

265 **Code availability**

266 Upon publication customed scripts supporting this work will be available at  
267 [github.com/schneeberger-lab/GameteBinning\\_tetraploid](https://github.com/schneeberger-lab/GameteBinning_tetraploid).

## 268 REFERENCES

- 269 1. The Food and Agriculture Organization (FAO). <http://www.fao.org/faostat/en/#data/QV>  
270 (2021).
- 271 2. Jansky, S. H. et al. Reinventing potato as a diploid inbred line-based crop. *Crop Sci.* **56**,  
272 1412-1422 (2016).
- 273 3. Douches, D.S., Maas, D., Jastrzebski, K., Chase, R. W. Assessment of Potato Breeding  
274 Progress in the USA over the Last Century. *Crop Sci.* **36**,1544-1552 (1996).
- 275 4. The Potato Genome Sequencing Consortium. Genome sequence and analysis of the  
276 tuber crop potato. *Nature* **475**, 189-195 (2011).
- 277 5. Pham, G.M. & Hamilton, J.P. et al. Construction of a chromosome-scale long-read  
278 reference genome assembly for potato. *GigaScience* **9**, 1-11 (2020).
- 279 6. Zhou, Q. & Tang, D. et al. Haplotype-resolved genome analyses of a heterozygous  
280 diploid potato. *Nat. Genet.* **52**, 1018-1023 (2020).
- 281 7. Koren, S. & Rhie, A. et al. De novo assembly of haplotype-resolved genomes with trio  
282 binning. *Nat. Biotechnol.* **36**, 1174-1182 (2018).
- 283 8. Campoy, J.A. & Sun, H.Q. et al. *Gamete binning*: chromosome-level and haplotype-  
284 resolved genome assembly enabled by high-throughput single-cell sequencing of gamete  
285 genomes. *Genome Biol.* **21**, 306 (2020).
- 286 9. Li, R. & Qu, H. et al. Inference of chromosome-length haplotypes using genomic data of  
287 three or a few more single gametes. *Mol Biol Evol.* **37**, 3684-3698 (2020).
- 288 10. Kirkness, E.F. et al. Sequencing of isolated sperm cells for direct haplotyping of a human  
289 genome. *Genome Res.* **23**, 826-832 (2013).
- 290 11. Shi, D., Wu, J., Tang, H. & Yin, H. et al. Single-pollen-cell sequencing for gamete-based  
291 phased diploid genome assembly in plants. *Genome Res.* **29**, 1889-1899 (2019).
- 292 12. Zhou, C. et al. Assembly of whole-chromosome pseudomolecules for polyploid plant  
293 genomes using outbred mapping populations. *Nat. Genet.* **52**, 1256-1264 (2020).
- 294 13. Garg, S. et al. Chromosome-scale, haplotype-resolved assembly of human genomes.  
295 *Nat. Biotechnol.* (2020).

- 296 14. Zhang, J., Zhang, X., Tang, H. & Zhang, Q. *et al.* Allele-defined genome of the  
297 autopolyploid sugarcane *Saccharum spontaneum* L. *Nat. Genet.* **50**, 1565-1573 (2018).
- 298 15. Chen, H., Zeng, Y., Yang, Y., Huang, L., Tang, B. & Zhang, H. *et al.* Allele-aware  
299 chromosome-level genome assembly and efficient transgene-free genome editing for the  
300 autotetraploid cultivated alfalfa. *Nat Commun* **11**, 2494 (2020).
- 301 16. Zhang, X., Zhang, S., Zhao, Q., Ming, R. & Tang, H. Assembly of allele-aware,  
302 chromosomal-scale autopolyploid genomes based on Hi-C data. *Nat. Plants* **5**, 833-845  
303 (2019).
- 304 17. Linsmith, G. *et al.* Pseudo-chromosome-length genome assembly of a double haploid  
305 “Bartlett” pear (*Pyrus communis* L.). *GigaScience* **8**, 1-17 (2019).
- 306 18. Cheng, H., Concepcion, G.T., Feng, X., Zhang, H., Li, H. Haplotype-resolved de novo  
307 assembly with phased assembly graphs. *Nat Methods* **18**, 170-175 (2021).
- 308 19. Simão, F. A. and Waterhouse, R. M. *et al.* BUSCO: Assessing genome assembly and  
309 annotation completeness with single-copy orthologs. *Bioinformatics* **31**, 3210-3212  
310 (2015).
- 311 20. Hutten, R.C.B. and Berloo, R. van. An online potato pedigree database. URL:  
312 <http://www.plantbreeding.wur.nl/PotatoPedigree/> (2001).
- 313 21. Berloo, R. van, Hutten, R.C.B, Eck, H.J. van and Visser, R.G.F. An online potato  
314 pedigree database resource. *Potato research* **50**, 45-57 (2007).
- 315 22. Hardigan, M.A., Laimbeer, F.P.E., Newton, L., Crisovan, E., Hamilton, J.P., Vaillancourt,  
316 B. *et al.* Genome diversity of tuber-bearing *Solanum* uncovers complex evolutionary  
317 history and targets of domestication in the cultivated potato. *Proc Natl Acad Sci U S A*  
318 **114**, E9999-E10008 (2017). doi: 10.1073/pnas.1714380114.
- 319 23. Van de Weyer, A.L., Monteiro, F., Furzer, O.J., *et al.* A Species-Wide Inventory of NLR  
320 Genes and Alleles in *Arabidopsis thaliana*. *Cell.* **178**, 1260-1272 (2019).
- 321 24. Seong, K., Seo, E., Witek, K., Li, M., Staskawicz, B. Evolution of NLR resistance genes  
322 with noncanonical N-terminal domains in wild tomato species. *New Phytol.* **227**, 1530-  
323 1543 (2020).

- 324 25. Bourke, P.M., Voorrips, R.E., Visser, R.G., Maliepaard, C. The double-reduction  
325 landscape in tetraploid potato as revealed by a high-density linkage map. *Genetics*,  
326 201:853-863 (2015).
- 327 26. J. Muthoni, H. Shimelis, R. Melis. Production of hybrid potatoes: Are heterozygosity and  
328 ploidy levels important? *Australian Journal of Crop Science* **13**, 687-694 (2019).
- 329 27. Lindhout, P. *et al.* Towards F1 Hybrid Seed Potato Breeding. *Potato Res.* **54**, 301-312  
330 (2011).
- 331 28. Ye, M. & Peng, Z. *et al.* Generation of self-compatible diploid potato by knockout of S-  
332 RNase. *Nature Plants* **4**, 651-654 (2018).
- 333 29. Li, Y., Li, G., Li, C., Qu, D. & Huang, S. Prospects of diploid hybrid breeding in potato.  
334 *Chin. Potato J.* **27**, 96-99 (2013).
- 335 30. Zhang, C., Wang, P., Tang, D. *et al.* The genetic basis of inbreeding depression in  
336 potato. *Nat Genet.* **51**, 374-378 (2019).
- 337 31. Lian. Q., Tang, D., Bai, Z., Qi, J., Lu, F., Huang, S., Zhang, C. Acquisition of deleterious  
338 mutations during potato polyploidization. *J Integr Plant Biol.* **61**, 7-11 (2019).
- 339 32. Langmead, B., and Salzberg, S. L. Fast gapped-read alignment with *Bowtie 2*. *Nature*  
340 *methods* **9**, 357-359 (2012).
- 341 33. Li, H. *Minimap2*: Pairwise alignment for nucleotide sequences. *Bioinformatics* **34**(18),  
342 3094-100 (2018).
- 343 34. Li, H. *et al.* The Sequence Alignment/Map format and SAMtools. *Bioinformatics* **25**, 2078-  
344 2079 (2009).
- 345 35. Quinlan, A. R. & Hall, I. M. *BEDTools*: A flexible suite of utilities for comparing genomic  
346 features. *Bioinformatics* **26**, 841-842 (2010).
- 347 36. Goel, M., Sun, H., Jiao, W. B. & Schneeberger, K. *SyRI*: finding genomic rearrangements  
348 and local sequence differences from whole-genome assemblies. *Genome Biol.* **20**, 1-13  
349 (2019).
- 350

351 **Figure legends**

352 **Figure 1. Haplotype-resolved assembly of an autotetraploid potato genome.** **a.** Assembly  
353 strategy (gamete binning) for tetraploid genomes. Long reads are sequenced from somatic DNA and  
354 an initial contig-level assembly is generated. In addition, sequencing data of gamete genomes are  
355 generated. Genetic linkage enables grouping of the contig into clusters, which represent the individual  
356 haplotypes. Long reads are assigned to haplotypes based on their similarity to the contigs. Each  
357 haplotype can be assembled separately and scaffolded to chromosome-scale using Hi-C. (The figure  
358 was created with help of BioRender.com.) **b.** Histogram of sequencing depth within 10 kb windows of  
359 the initial assembly revealed existence of haplotigs (68.3%), diplotigs (21.4%), triplotigs (7.9%) and  
360 tetraplotigs (2.0%). **c.** Assembly sizes of the haplotypes were highly consistent to the  $DM^5$  and  $RH^6$   
361 assemblies. **d.** *k*-mer based evaluation of the haplotyping accuracy. Each point represents one  
362 haplotype and indicates the numbers of *k*-mers specific to one of the parental genomes *Hera* or  
363 *Stieglitz*. Overall, 99.6% of the variation were correctly phased.

364 **Figure 2. Haplotype-resolved and chromosome-scale assembly of the tetraploid potato cultivar**  
365 **Otava.** **a.** Gene density (number of genes within 2 Mb windows) along the four haplotypes of each of  
366 the 12 chromosomes. **b.** Percentage of transposable element (TE) related sequence within 2 Mb  
367 windows. The links in the center show over 600 structural rearrangements larger than 100 kb found  
368 between the four haplotypes of each chromosome. Light and dark blue box refer to the maternally and  
369 paternally inherited chromosomes.

370 **Figure 3. Haplotype analysis of the tetraploid genome.** **a.** SNP density as observed in pairwise  
371 comparisons between the haplotypes revealed two separated peaks. The high abundance of highly  
372 similar regions suggested the existence of identical-by-descent (IBD) blocks. **b.** IBD blocks across the  
373 genome. Regions shared by two, three or four haplotypes are colored in red, orange or blue. **c.** A  
374 zoom-in on the IBD regions and structural rearrangements of LG-4. Large IBD regions were more  
375 likely to occur in peri-centromeric regions with low gene, but high TE content and suppressed meiotic  
376 recombination. (Colors as defined in **b** and **e**) **d.** Average alignment statistics and structural  
377 rearrangements in each chromosome. **e.** Structural rearrangements between the four haplotypes of  
378 each LG. **f.** Correlation of the size of 220 duplications, 207 translocations and 234 inversions with  
379 gene density.

380 **Figure 4. Impact of haplotype divergence on genes.** **a.** Pair-wise allelic divergence of genes. **b.**  
381 Presence/absence variations of genes. Overall, 53.6%, 20.0%, 15.9% or 10.5% of the genes showed  
382 four, three, two or one allele(s) within the tetraploid genome with an average of 3.2 allelic copies per  
383 gene. Within the genes with four allelic copies, one (22.3%), two (29.8%), three (32.5%) or four (15.4%)  
384 divergent allele/s were observed. **c.** GO enrichment analysis of genes with four identical alleles.

385

**a**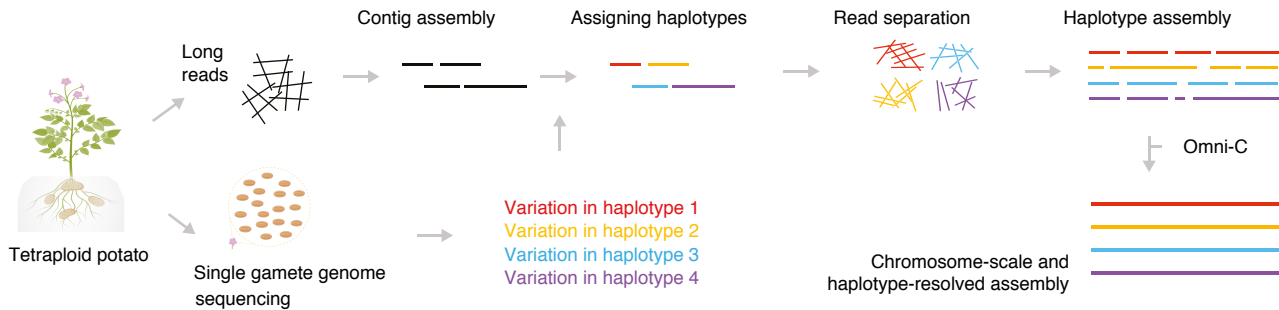**b**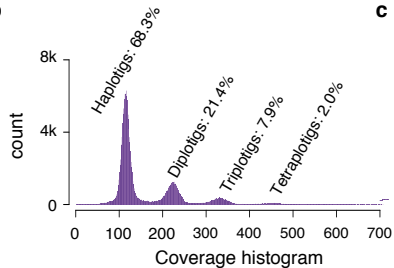**c**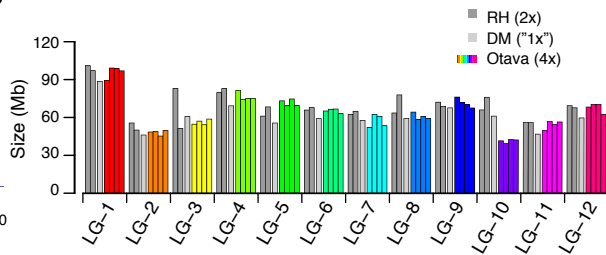**d**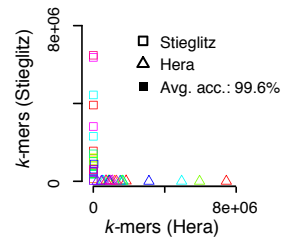



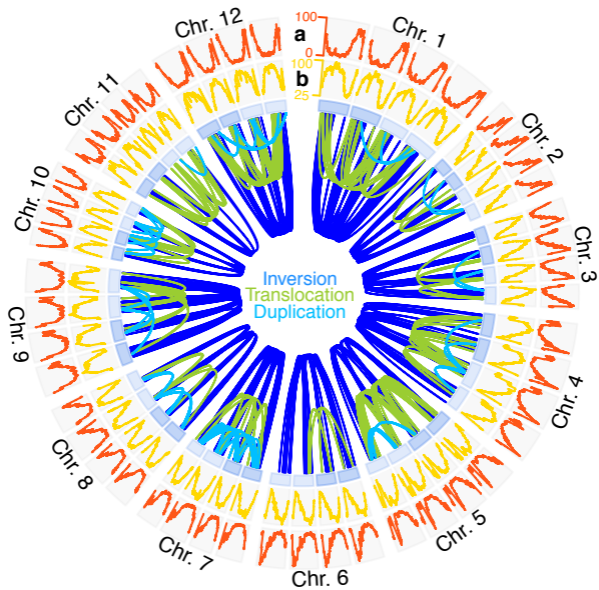

**a**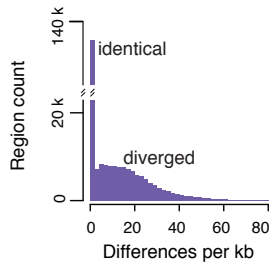**b**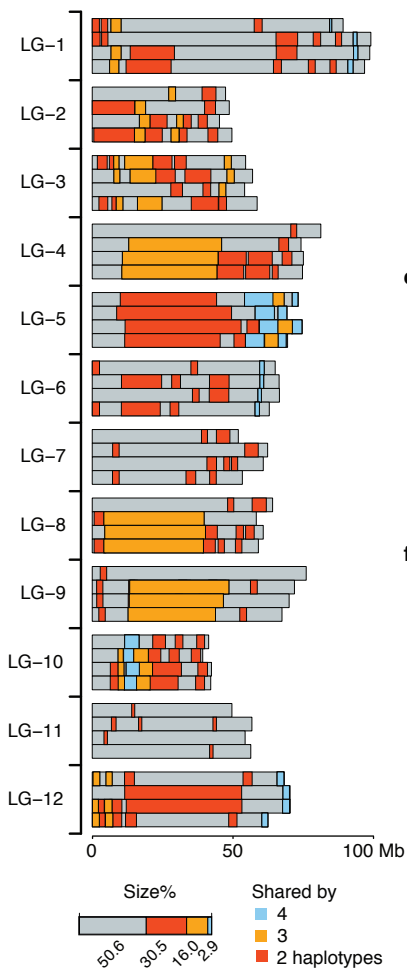**c**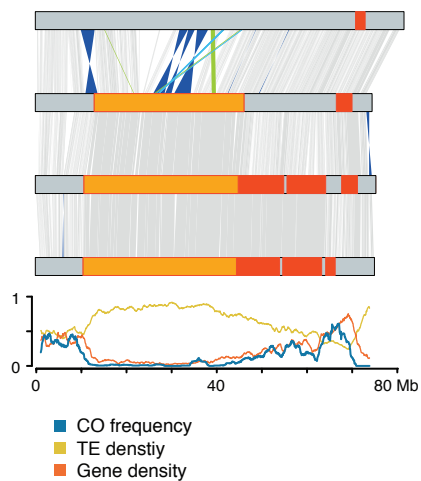**d**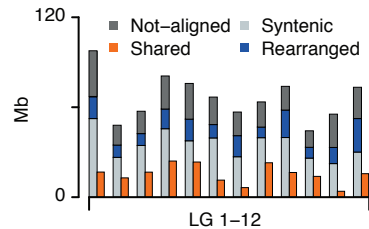**f**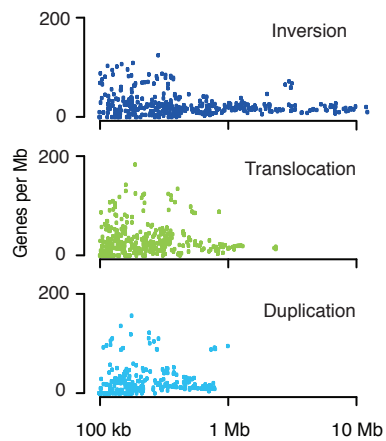**e**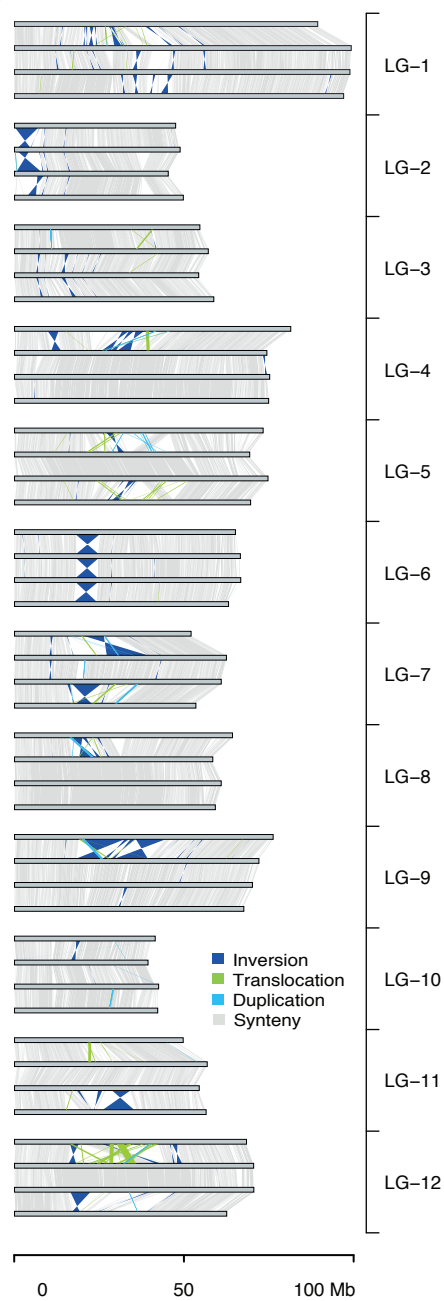

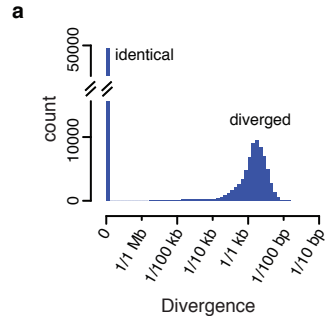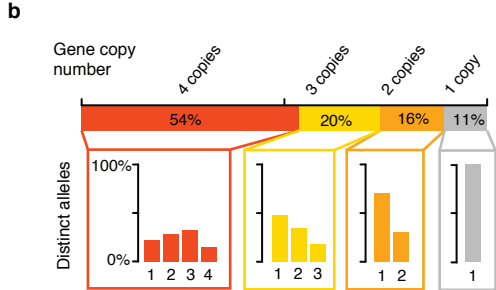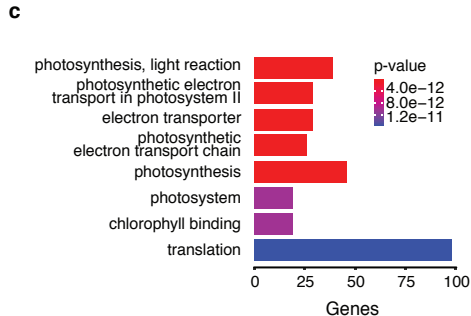

Source: https://www.biorxiv.org/content/10.1101/2021.05.15.444292v1.full.pdf
